# Supplementary material
Source: ML conference proceedings conference paper supplement (https://openreview.net/forum?id=7U-rmW7TPHM)
Supplement: supplementary_material [file attachment]

Project Page and Code: <https://sites.google.com/view/iclr22-efficientphys>
